# Supplementary material
Source: publisher site journal article supplement (https://www.spandidos-publications.com/7179/downloadSupplementary)

Figure S1. Analysis of lipid-related gene expression using reverse transcription-quantitative PCR in MCF-7 and MDA-MB-231 cells under normoxic and hypoxic conditions for 48 h. \*P<0.05; \*\*P<0.01; \*\*\*P<0.001. VLDLR, very low-density lipoprotein receptor; FABP3, fatty acid binding protein 3; FABP7, fatty acid binding protein 7; PLIN2, perilipin 2; HILPDA, hypoxia inducible lipid droplet associated; PNPLA2, patatin like phospholipase domain containing 2; LPIN1, lipin 1; DGAT1, diacylglycerol O-acyltransferase 1; SREBF1, sterol regulatory element-binding factor 1; FASN, fatty acid synthase.

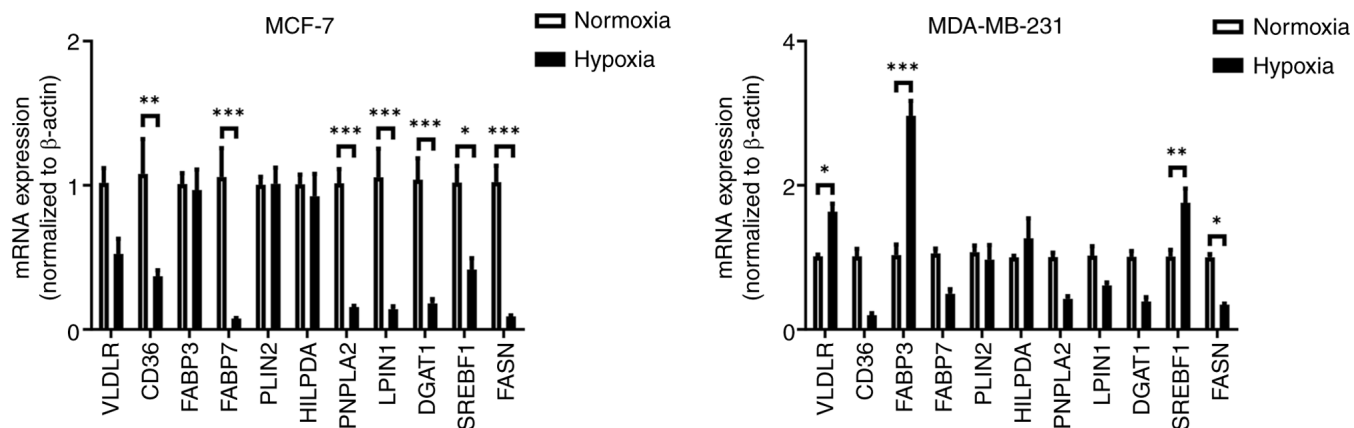

Figure S2. Increased autophagy in MCF-7 and MDA-MB-231 cells following rapamycin treatment under hypoxic conditions. Analysis of autophagy using the Cyto-ID detection kit according to rapamycin concentration in MCF-7 and MDA-MB-231 cells under hypoxic conditions for 48 h. \*\*P<0.01; \*\*\*P<0.001. ns, not significant.

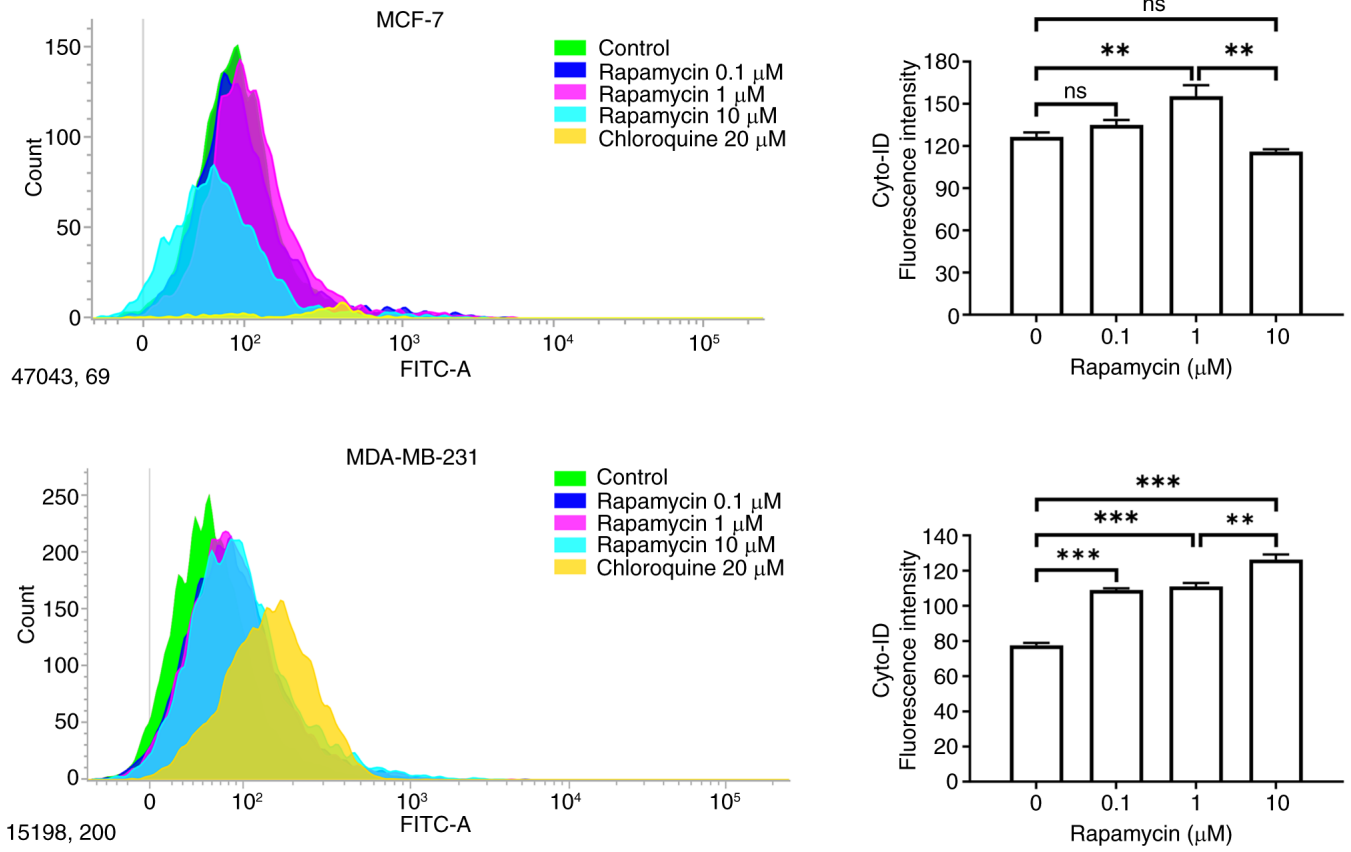

Supplement: Supplementary file 1 [file downloadSupplementary]
